# Supplementary material
Source: PubMed Central journal article supplement (PMC6595453)
Supplement: JCM.00215-19-s0001.pdf [file JCM.00215-19-s0001.pdf]

**Supplementary TABLE S1.** Drug resistance profiles of Russian *M. tuberculosis* isolates of different genotypes.

| <b>Genotype<br/>Drug resistance profile*</b> | <b>Beijing 94-32<br/>CAO</b> | <b>Beijing 94-32 non-<br/>CAO</b> | <b>Beijing<br/>B0/W148</b> | <b>Beijing<br/>other</b> | <b>Non-Beijing</b> |
|----------------------------------------------|------------------------------|-----------------------------------|----------------------------|--------------------------|--------------------|
| Sensitive                                    |                              | 43                                | 1                          |                          | 32                 |
| E                                            |                              |                                   |                            |                          | 1                  |
| H                                            |                              | 1                                 |                            |                          | 1                  |
| R                                            |                              | 1                                 |                            |                          |                    |
| S                                            |                              | 5                                 |                            |                          | 1                  |
| Z                                            |                              | 2                                 |                            |                          | 1                  |
| HR                                           |                              |                                   |                            |                          | 1                  |
| SH                                           | 2                            | 3                                 | 3                          | 1                        | 2                  |
| SHE                                          | 1                            |                                   | 1                          |                          |                    |
| SHEaOR                                       |                              |                                   | 1                          |                          |                    |
| SHEaR                                        |                              |                                   | 3                          |                          |                    |
| SHEEaR                                       |                              |                                   | 1                          |                          |                    |
| SHEEaRZ                                      |                              |                                   | 1                          |                          |                    |
| SHEKOCpCsRZ                                  |                              | 1                                 |                            |                          |                    |
| SHEKOCpR                                     |                              | 1                                 | 1                          |                          |                    |
| SHEKOCpRZ                                    |                              |                                   | 1                          |                          |                    |
| SHEKR                                        |                              | 1                                 | 1                          |                          |                    |
| SHEKZR                                       |                              | 1                                 |                            |                          |                    |
| SHK CpEaR                                    |                              |                                   | 1                          |                          |                    |
| SHKEaOR                                      |                              |                                   | 1                          |                          |                    |
| SHKOCpR                                      |                              |                                   | 1                          |                          |                    |
| SHKOR                                        |                              |                                   | 1                          |                          |                    |
| SHKR                                         |                              | 1                                 | 1                          |                          |                    |
| SHKRZ                                        |                              |                                   |                            | 1                        |                    |
| SHR                                          | 2                            | 6                                 | 19                         |                          |                    |
| SHE                                          |                              |                                   | 1                          | 1                        |                    |
| SHER                                         | 1                            |                                   | 8                          |                          |                    |
| SHERKZ                                       |                              |                                   | 1                          |                          |                    |
| SHERZ                                        |                              | 1                                 | 1                          |                          |                    |
| SHEtER                                       |                              |                                   |                            |                          | 1                  |
| SHEtEKR                                      |                              | 1                                 |                            |                          |                    |
| SHEtEKZR                                     |                              | 2                                 |                            |                          |                    |
| SHEKR                                        |                              | 1                                 | 3                          |                          |                    |
| SHEKRZO                                      |                              | 1                                 |                            |                          |                    |
| SHEKRO                                       |                              |                                   | 2                          |                          | 1                  |
| SHEKZRO                                      |                              | 1                                 |                            |                          |                    |
| SHKR                                         |                              |                                   | 1                          |                          |                    |

\*One-letter abbreviation of drug resistance: S - streptomycin, H - isoniazid, R - rifampicin, E - ethambutol, Z - pyrazinamide, O - ofloxacin, K - kanamycin, Cp -capreomycin, Cs – cycloserine, Et – ethionamide.
